# Supplementary material for: Anti-Inflammatory, Barrier Maintenance, and Gut Microbiome Modulation Effects of Saccharomyces cerevisiae QHNLD8L1 on DSS-Induced Ulcerative Colitis in Mice
Source: MDPI journal article supplement (doi:10.3390/ijms24076721), 2023-04-04
Supplement: s1 [file s1]

## Supplementary Information

Table S1: Primer sequences used for RT-qPCR in Caco-2 cells

Table S2: Animal model experimental design

Table S3: Scoring system for disease activity index (DAI)

Table S4: Primer sequences used for RT-qPCR in colitis mice

Figure S1: Effects of *S. boulardii* CNCMI-745, *K. marxianus* QHBYC4L2 and *D. hansenii* QSCLS6L3 on gut microbial functions.

**Table S1.** Primer sequences used for RT-qPCR in Caco-2 cells.

| Genes          | Sequence (5'-3')                                       |
|----------------|--------------------------------------------------------|
| $\beta$ -actin | F: CCTTCCCTCCTCAGATCATTGC<br>R: ATACTCCTGCTTGCTGATCCAC |
| Claudin-1      | F: GATGAGGATGGCTGTCATTG<br>R: CCTGACCAAATTCGTACCTG     |
| Occludin       | F: CACGCTTGCCTGGGACAGAG<br>R: TCTGTATAGCCTCCGTAGCC     |
| ZO-1           | F: CACGCTTGCCTGGGACAGAG<br>R: TCTGTATAGCCTCCGTAGCC     |

**Table S2.** Animal model experimental design.

| Group                         | Daily Gavage Treatment (0.2mL)                         | 1-7 Days         | 8-14 Days        |
|-------------------------------|--------------------------------------------------------|------------------|------------------|
| Control                       | Saline (0.9%)                                          | sterilized water | sterilized water |
| Model                         | Saline (0.9%)                                          | sterilized water | DSS water (2.5%) |
| <i>S. boulardii</i> CNCMI-745 | 1×10 <sup>8</sup> CFU/mL <i>S. boulardii</i> CNCMI-745 | sterilized water | DSS water (2.5%) |
| <i>K. marxianus</i> QHBYC4L2  | 1×10 <sup>8</sup> CFU/mL <i>K. marxianus</i> QHBYC4L2  | sterilized water | DSS water (2.5%) |
| <i>S. cerevisiae</i> QHNLD8L1 | 1×10 <sup>8</sup> CFU/mL <i>S. cerevisiae</i> QHNLD8L1 | sterilized water | DSS water (2.5%) |
| <i>D. hansenii</i> QSCLS6L3   | 1×10 <sup>8</sup> CFU/mL <i>D. Hansenii</i> QSCLS6L3   | sterilized water | DSS water (2.5%) |

**Table S3.** Scoring system for disease activity index (DAI).

| Score | Weight Loss (%) | Stool Consistency         | Blood in Feces              |
|-------|-----------------|---------------------------|-----------------------------|
| 0     | None            | Normal                    | Negative (no bleeding)      |
| 1     | 1.0~5.0         | Loose stools              | Negative                    |
| 2     | 5.0~10.0        | Loose stools              | Hemoccult positive (slight) |
| 3     | 10.0~15.0       | Diarrhea (slight)         | Hemoccult positive          |
| 4     | Over 15.0       | Diarrhea(Watery diarrhea) | Gross bleeding              |

**Table S4.** Primer sequences used for RT-qPCR in colitis mice

| Genes          | Sequence (5'-3')          |
|----------------|---------------------------|
| $\beta$ -actin | F: CCTTCCCTCCTCAGATCATTGC |
|                | R: ATACTCCTGCTTGCTGATCCAC |
| Claudin-1      | F: TGGATGGCTGTCATTGGGG    |
|                | R: ACCTGGCATTGATGGGGGT    |
| Occludin       | F: ATAATGGGAGTGAACCCGACG  |
|                | R: CCACGATAATCATGAACCCCA  |
| ZO-1           | F: GGGAGGGTCAAATGAAGACA   |
|                | R: GGCATTCTGCTGGTTACAT    |

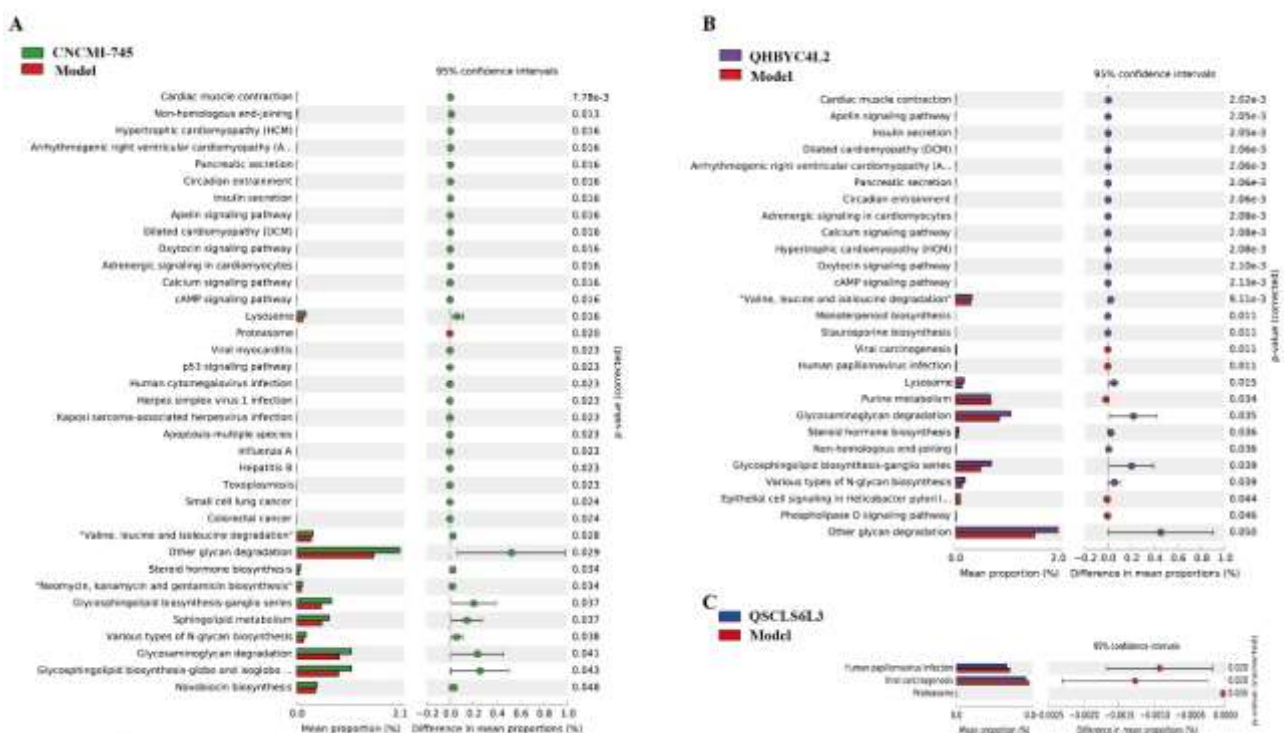

**Figure S1.** Effects of *S. boulardii* CNCMI-745, *K. marxianus* QHBYC4L2 and *D. hansenii* QSCLS6L3 on gut microbial functions. **(A)** Differences in predicted functions between *S. boulardii* CNCMI-745 and DSS groups. **(B)** Differences in predicted functions between *K. marxianus* QHBYC4L2 and DSS groups. **(C)** Differences in predicted functions between *D. hansenii* QSCLS6L3 and DSS groups.
